# Supplementary material for: The influence of the sacrificial agent nature on transformations of the Zn(OH)2/Cd0.3Zn0.7S photocatalyst during hydrogen production under visible light
Source: PubMed Central journal article supplement (PMC9048281; doi:10.1039/c9ra08833d), 2020-01-08
Supplement: RA-010-C9RA08833D-s001.pdf [file RA-010-C9RA08833D-s001.pdf]

### SUPPORTING INFORMATION

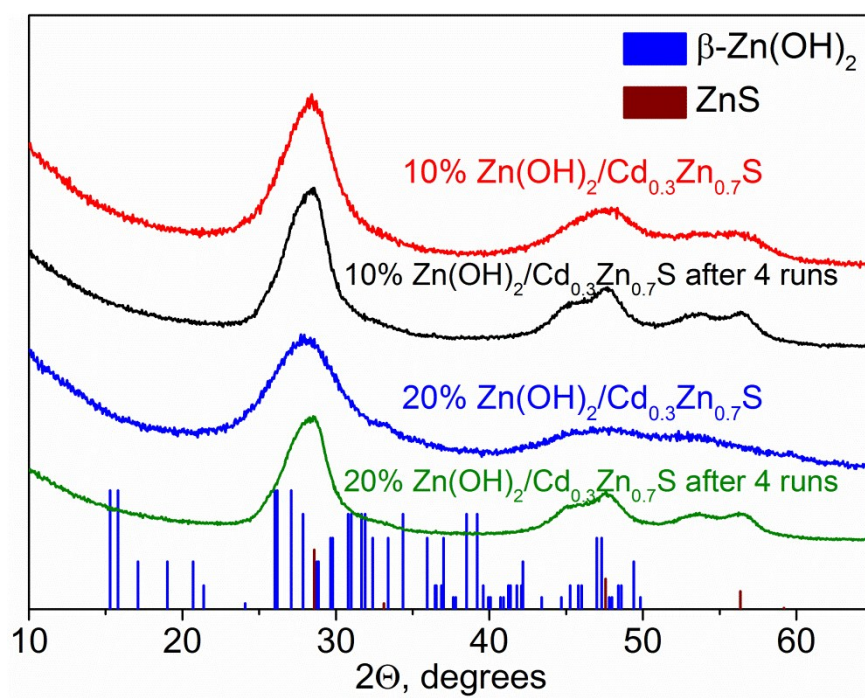

**Fig. S1.** XRD patterns of 10% Zn(OH)<sub>2</sub>/Cd<sub>0.3</sub>Zn<sub>0.7</sub>S and 20% Zn(OH)<sub>2</sub>/Cd<sub>0.3</sub>Zn<sub>0.7</sub>S before and after photocatalytic hydrogen production from aqueous 0.1 M Na<sub>2</sub>S/0.1 M Na<sub>2</sub>SO<sub>3</sub> solution

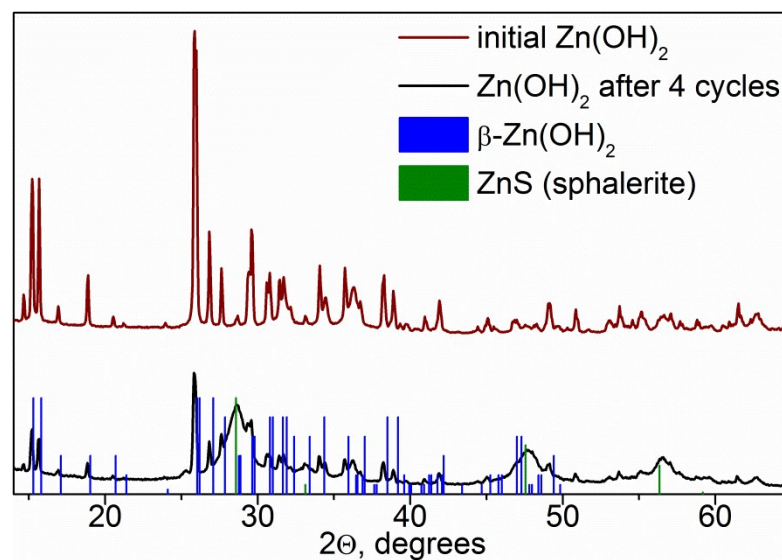

**Fig. S2.** XRD patterns of blank Zn(OH)<sub>2</sub> before and after photocatalytic hydrogen production from aqueous 0.1 M Na<sub>2</sub>S/0.1 M Na<sub>2</sub>SO<sub>3</sub> solution
